# Supplementary material for: Delivery of home-based postpartum contraception in rural Guatemalan women: a cluster-randomized trial protocol
Source: Trials. 2019 Nov 21;20:639. doi: 10.1186/s13063-019-3735-3 (PMC6869182; doi:10.1186/s13063-019-3735-3)
Supplement: Supplementary file 1 — Additional file 1. Data collection forms. [file 13063_2019_3735_MOESM1_ESM.pdf]

# Abordaje

Código de Identificación

\_\_\_\_\_

**Completar esta hoja de registro para TODOS los sujetos que sean abordados para este estudio. (Se llena para mujeres que no quieren participar y también para mujeres que no puede participar porque no cumple con los criterios).**

Equipo

- ☐ Azul  
☐ Rojo  
☐ Amarillo

Fecha de Abordaje

\_\_\_\_\_

¿Es elegible?

- ☐ Si  
☐ No

Si no es elegible, explique ¿por que no?

\_\_\_\_\_

¿Quiere participar?

- ☐ Yes  
☐ No

Si no quiere participar, explique ¿por que no?

\_\_\_\_\_

Iniciales

\_\_\_\_\_

# Encuesta Inicial

Fecha

\_\_\_\_\_

## Consentimiento

Consentimiento completado

- ☐ Si  
☐ No

Si no, por que?

\_\_\_\_\_

Foto del consentimiento completo

Nombre

\_\_\_\_\_

¿Cuántos partos ha tenido?

\_\_\_\_\_  
((Esto incluye bebes nacidos vivos, bebes que han fallecido despues del parto y bebes que han muerto intrautero))

Fecha de Parto

\_\_\_\_\_  
(Favor de elegir la fecha del parto MAS RECIENTE)

Comunidad

- ☐ Morenas  
☐ Valle Lirio  
☐ Palmar II  
☐ Barillas  
☐ Carrizales  
☐ Chiquirines  
☐ Chiquirines- Colonia Diaz  
☐ Los Encuentros  
☐ Los Encuentros- San Luis  
☐ Pomal  
☐ Santa Fe  
☐ El Troje  
(REVISAR SI ES INTERVENCIÓN O CONTROL)

Resultado de la prueba de embarazo urinaria:  
NO EMPIECE EL ANTICONCEPTIVO SI ESTÁ EMBARAZADA

- ☐ Negativo  
☐ Positivo  
☐ No Aplica

PARA LA ENFERMERA: Si usted administró o fue a dejar/distribuyó el anticonceptivo a la paciente, por favor escriba el número de lote, expiración, y el resultado de la prueba de embarazo.

---

¿Qué método anticonceptivo escogió usted hoy?

- ☐ Ningunos de los métodos ofrecidos  
☐ Condones  
☐ Pastillas  
☐ Inyección  
☐ Implante  
((Se le ofreció a la paciente condones, pastillas, depo, y jadelle en la casa))
- 

Número de Lote

---

Fecha de expiración

---

¿Por qué escogió este/estos métodos?

- ☐ Lo he usado antes  
☐ Otra gente en mi comunidad los ha usado y les ha gustado  
☐ Creo que es la mejor opción que la enfermera ofreció  
☐ Puedo pagar por este método cuando lo necesite otra vez  
☐ Otro  
((marque todos los que apliquen))
- 

Si escogió otro, explique

---

¿Qué método anticonceptivo está planeando utilizar?

- ☐ No estoy planeando en empezar un método anticonceptivo  
☐ Estoy planeando en abstenerme  
☐ Estoy planeando usar el método natural de familia/método rítmico  
☐ Estoy planeando usar amenorrea de la lactancia/ dar de mamar  
☐ Estoy planeando usar condones pero no quería empezarlos en la casa hoy.  
☐ Estoy planeando usar las pastillas pero no las quería empezarlas en la casa hoy.  
☐ Estoy planeando usar la inyección pero no quería empezarla en la casa hoy.  
☐ Estoy planeando usar el implante pero no quería empezararlo hoy.  
☐ Estoy planeando usar la T de cobre  
☐ Estoy planeando usar operación/ligadura  
☐ Mi esposo está planeando hacerse una vasectomía  
☐ Mi esposo se hizo la vasectomía  
☐ No estoy segura/ No sé
- 

¿En dónde planea conseguir este/estos métodos si no escogió un método anticonceptivo hoy?

- ☐ Clínica Privada  
☐ Puesto de Salud  
☐ Farmacia  
☐ Hospital  
☐ No sé  
☐ Otro  
((marque todos que apliquen))
- 

Si escogió otro, explique

---

---

¿En dónde planea conseguir este/estos métodos?

- ☐ Clínica Privada  
☐ Puesto de Salud  
☐ Farmacia  
☐ Hospital  
☐ No sé  
☐ Otro  
((marque todos que apliquen))

---

Si escogió otro, explique

---

---

Si la paciente escogió "No estoy planeando empezar un método de contracepción", por favor pregunte, ¿por qué?

- ☐ Quiero quedar embarazada  
☐ No tengo una pareja entonces no necesito un método anticonceptivo.  
☐ Mi pareja no está de acuerdo que use un método anticonceptivo.  
☐ Tengo miedo de los efectos secundarios  
☐ No quiero empezar un método anticonceptivo porque no voy a poder continuarlo por problemas de tiempo, costo, o transporte.  
☐ No sé  
☐ Otro

---

Si escogió otro motivo por el cual no esta usando un método de contracepción, explique el motivo

---

---

Si escogió que tiene miedo de los efectos secundarios, ¿cuáles son esos efectos secundarios?

---

---

Si la paciente no escogió el implante, pregúntele, ¿por qué no escogió el implante?

- ☐ Quiero quedar embarazada  
☐ No tengo una pareja entonces no necesito un método anticonceptivo.  
☐ He usado el método que escogí antes, y lo quería usar ahorita, otra vez.  
☐ Tengo miedo de los efectos secundarios  
☐ He oído malas cosas sobre el implante  
☐ Tengo miedo que me pongan el implante en el brazo  
☐ Tengo miedo que me pongan el implante en la casa  
☐ No quiero que me quiten el implante en el futuro  
☐ No sé  
☐ Otro

---

Si escogió que tiene miedo de los efectos secundarios del implante, ¿cuáles son esos efectos secundarios?

---

---

Si ha oido cosas malas, ¿qué ha oído?:

---

---

Si escogió otro motivo por el cual no usa el implante, explique el motivo

---

---

Si le ofreciéramos un dispositivo intrauterino (DIU) en su casa durante una visita, ¿estaría interesada en recibirlo?

- ☐ Sí  
☐ No  
☐ No sé  
☐ Otro

---

Si escogió otro motivo, explique

---

## Llamada de Seguimiento- 3 Meses (Grupo de Intervencion CON METODO)

En su visita de postparto la enfermera le dio  
¿todavía sigue usando este método?

- ☐ Si  
☐ No  
((muestre el método que la paciente escogió en la primera pregunta de la encuesta Int de PPV, posiblemente: pastillas, condones, inyección, o implante))

¿Qué tan satisfecha esta con este método?

- ☐ Muy satisfecha  
☐ Un poco satisfecha  
☐ Un poco insatisfecha  
☐ Muy insatisfecha

Por favor, discúlpese por esta insatisfacción y pregunte ¿por qué?

- ☐ El medicamento causa efectos secundarios  
☐ Es muy cara  
☐ Es muy difícil de obtener  
☐ No está siempre disponible  
☐ Otro  
((Marque todos los que apliquen))

Si escogió otro, explique

\_\_\_\_\_

Si escogió que el medicamento causó efectos secundarios, ¿cuáles son esos efectos secundarios?

\_\_\_\_\_

¿Por qué discontinuó el método?

- ☐ No me gustaban los efectos secundarios  
☐ Quería quedar embarazada  
☐ No podía pagar la continuación del método  
☐ No podía pagar el transporte para obtener el método  
☐ El método no estaba disponible cuando lo fui a obtener  
☐ No tengo una pareja entonces no quería continuar el método  
☐ Mi pareja me pidió que dejara de usar el método  
☐ No sé  
☐ Otro  
((Marque todos los que apliquen))

Si escogió otro ¿por qué otro motivo discontinuó el método?

\_\_\_\_\_

¿Empezó un método nuevo?

- ☐ Si  
☐ No

---

|                              |                                                                                                                                                                                                                                                                                                                                                                                                                                                                                                                                                |
|------------------------------|------------------------------------------------------------------------------------------------------------------------------------------------------------------------------------------------------------------------------------------------------------------------------------------------------------------------------------------------------------------------------------------------------------------------------------------------------------------------------------------------------------------------------------------------|
| ¿Qué método está utilizando? | <input type="checkbox"/> Abstinencia<br><input type="checkbox"/> Método natural de familia/método rítmico<br><input type="checkbox"/> Amenorrea de la lactancia/ dar de mamar<br><input type="checkbox"/> Condones<br><input type="checkbox"/> Pastillas<br><input type="checkbox"/> Inyección<br><input type="checkbox"/> Implante<br><input type="checkbox"/> Dispositivo intrauterino (DIU)<br><input type="checkbox"/> Operación/Ligadura<br><input type="checkbox"/> Mi esposo se hizo la vasectomía<br>((Marque todos los que apliquen)) |
|------------------------------|------------------------------------------------------------------------------------------------------------------------------------------------------------------------------------------------------------------------------------------------------------------------------------------------------------------------------------------------------------------------------------------------------------------------------------------------------------------------------------------------------------------------------------------------|

---

|                    |                                                                                                                                                                                                                                                                                                                                                                                                                                                                                                                                                                               |
|--------------------|-------------------------------------------------------------------------------------------------------------------------------------------------------------------------------------------------------------------------------------------------------------------------------------------------------------------------------------------------------------------------------------------------------------------------------------------------------------------------------------------------------------------------------------------------------------------------------|
| Si "no", ¿por qué? | <input type="checkbox"/> Quiero quedar embarazada<br><input type="checkbox"/> No tengo una pareja entonces no necesito un método anticonceptivo.<br><input type="checkbox"/> Mi pareja no esta de acuerdo que use un método anticonceptivo.<br><input type="checkbox"/> Tengo miedo de los efectos secundarios<br><input type="checkbox"/> No quiero empezar un método anticonceptivo porque no voy a poder continuarlo por problemas de tiempo, costo, y transporte.<br><input type="checkbox"/> No sé<br><input type="checkbox"/> Otro<br>((Marque todos los que apliquen)) |
|--------------------|-------------------------------------------------------------------------------------------------------------------------------------------------------------------------------------------------------------------------------------------------------------------------------------------------------------------------------------------------------------------------------------------------------------------------------------------------------------------------------------------------------------------------------------------------------------------------------|

---

|                                                                                                  |       |
|--------------------------------------------------------------------------------------------------|-------|
| Si escogió otro motivo por el cual no esta usando un método de contracepción, explique el motivo | _____ |
|--------------------------------------------------------------------------------------------------|-------|

---

|                                                                                              |       |
|----------------------------------------------------------------------------------------------|-------|
| Si escogió que tiene miedo de los efectos secundarios, ¿cuáles son esos efectos secundarios? | _____ |
|----------------------------------------------------------------------------------------------|-------|

---

|                                                      |                                                                                     |
|------------------------------------------------------|-------------------------------------------------------------------------------------|
| Desde que dio a luz, ¿ha vuelto a quedar embarazada? | <input type="radio"/> Sí<br><input type="radio"/> No<br><input type="radio"/> No sé |
|------------------------------------------------------|-------------------------------------------------------------------------------------|

---

|                            |                                                                                                                                                  |
|----------------------------|--------------------------------------------------------------------------------------------------------------------------------------------------|
| ¿Qué pasó con el embarazo? | <input type="radio"/> Aborto espontáneo<br><input type="radio"/> Terminación del embarazo<br><input type="radio"/> Actualmente, estoy embarazada |
|----------------------------|--------------------------------------------------------------------------------------------------------------------------------------------------|

---

ENFERMERA: SI LA PACIENTE ESTÁ ACTUALMETNE EMBARAZADA, DEBERÍA ADVERTIRLE QUE PARE SU MÉTODO ANTICONCEPTIVO SI LO SIGUE USANDO Y QUE SE INSCRIBA EN MADRES SANAS.

# Llamada de Seguimiento- 3 Meses (Grupo de Intervencion SIN METODO)

¿Ha empezado un método anticonceptivo desde que dió a luz?

- ☐ Si  
☐ No

¿Qué método está utilizando?

- ☐ Abstinencia  
☐ Método natural de familia/método rítmico  
☐ Amenorrea de la lactancia/ dar de mamar  
☐ Condones  
☐ Pastillas  
☐ Inyección  
☐ Implante  
☐ Dispositivo intrauterino (DIU)  
☐ Operación/Ligadura  
☐ Mi esposo se hizo la vasectomía  
((Marque todos los que apliquen))

¿Qué tan satisfecha esta con este método?

- ☐ Muy satisfecha  
☐ Un poco satisfecha  
☐ Un poco insatisfecha  
☐ Muy insatisfecha

¿Por qué esta insatisfacción con este método?

- ☐ El medicamento causa efectos secundarios  
☐ Es muy cara  
☐ Es muy difícil de obtener  
☐ No está siempre disponible  
☐ Otro

Si escogió otro, explique

\_\_\_\_\_

Si escogió que el medicamento causó efectos secundarios, ¿cuáles son esos efectos secundarios?

\_\_\_\_\_

Si "no", ¿por qué?

- ☐ Quiero quedar embarazada  
☐ No tengo una pareja entonces no necesito un método anticonceptivo.  
☐ Mi pareja no esta de acuerdo que use un método anticonceptivo.  
☐ Tengo miedo de los efectos secundarios  
☐ No quiero empezar un método anticonceptivo porque no voy a poder continuarlo por problemas de tiempo, costo, y transporte.  
☐ No sé  
☐ Otro  
((Marque todos los que apliquen))

Si escogió otro motivo por el cual no esta usando un método de contracepción, explique el motivo

\_\_\_\_\_

Si escogió que tiene miedo de los efectos secundarios, ¿cuáles son esos efectos secundarios?

\_\_\_\_\_

Desde que dio a luz, ¿ha vuelto a quedar embarazada?

- ☐ Sí  
☐ No  
☐ No sé

---

¿Qué pasó con el embarazo?

- ☐ Aborto espontáneo  
☐ Terminación del embarazo  
☐ Actualmente, estoy embarazada
- 

ENFERMERA: SI LA PACIENTE ESTÁ ACTUALMETNE EMBARAZADA, DEBERÍA ADVERTIRLE QUE PARE SU MÉTODO ANTICONCEPTIVO SI LO SIGUE USANDO Y QUE SE INSCRIBA EN MADRES SANAS.

## Llamada de Seguimiento- 3 Meses (Grupo de Control)

¿Ha empezado un método anticonceptivo desde que dió a luz?

- ☐ Si  
☐ No

¿Qué método está utilizando?

- ☐ Abstinencia  
☐ Método natural de familia/método rítmico  
☐ Amenorrea de la lactancia/ dar de mamar  
☐ Condones  
☐ Pastillas  
☐ Inyección  
☐ Implante  
☐ Dispositivo intrauterino (DIU)  
☐ Operación/Ligadura  
☐ Mi esposo se hizo la vasectomía  
((Marque todos los que apliquen))

¿Qué tan satisfecha está con este método?

- ☐ Muy satisfecha  
☐ Un poco satisfecha  
☐ Un poco insatisfecha  
☐ Muy insatisfecha

¿Por qué esta insatisfacción con este método?

- ☐ El medicamento causa efectos secundarios  
☐ Es muy cara  
☐ Es muy difícil de obtener  
☐ No está siempre disponible  
☐ Otro

Si escogió otro, explique

\_\_\_\_\_

Si escogió que la medicación causó efectos secundarios, ¿cuáles son esos efectos secundarios?

\_\_\_\_\_

Si "no", ¿por qué?

- ☐ Quiero quedar embarazada  
☐ No tengo una pareja entonces no necesito un método anticonceptivo.  
☐ Mi pareja no está de acuerdo que use un método anticonceptivo.  
☐ Tengo miedo de los efectos secundarios  
☐ No quiero empezar un método anticonceptivo porque no voy a poder continuarlo por problemas de tiempo, costo, y transporte.  
☐ No sé  
☐ Otro  
((Marque todos los que apliquen))

Si escogió otro motivo por el cual no está usando un método de contracepción, explique el motivo

\_\_\_\_\_

Si escogió que tiene miedo de los efectos secundarios, ¿cuáles son esos efectos secundarios?

\_\_\_\_\_

Desde que dio a luz, ¿ha vuelto a quedar embarazada?

- ☐ Sí  
☐ No  
☐ No sé

---

¿Qué pasó con el embarazo?

- ☐ Aborto espontáneo
- ☐ Terminación del embarazo
- ☐ Actualmente, estoy embarazada

---

ENFERMERA: SI LA PACIENTE ESTÁ ACTUALMETNE EMBARAZADA, DEBERÍA ADVERTIRLE QUE PARE SU MÉTODO ANTICONCEPTIVO SI LO SIGUE USANDO Y QUE SE INSCRIBA EN MADRES SANAS.

## Llamada de Seguimiento- 12 Meses

Actualmente, ¿está usando un método anticonceptivo?

- ☐ Sí  
☐ No

¿Qué método está utilizando?

- ☐ Abstinencia  
☐ Método natural de familia/método rítmico  
☐ Amenorrea de la lactancia/ dar de mamar  
☐ Condones  
☐ Pastillas  
☐ Inyección  
☐ Implante  
☐ Dispositivo intrauterino (DIU)  
☐ Operación/Ligadura  
☐ Mi esposo se hizo la vasectomía  
((Marque todos los que apliquen))

¿Qué tan satisfecha está con este método?

- ☐ Muy satisfecha  
☐ Un poco satisfecha  
☐ Un poco insatisfecha  
☐ Muy insatisfecha

Por favor, discúlpese por esta insatisfacción y pregunte ¿por qué?

- ☐ El medicamento causa efectos secundarios  
☐ Es muy cara  
☐ Es muy difícil de obtener  
☐ No está siempre disponible  
☐ Otro  
((Marque todos los que apliquen))

Si escogió otro, explique

\_\_\_\_\_

Si escogió que el medicamento causó efectos secundarios, ¿cuáles son esos efectos secundarios?

\_\_\_\_\_

Si "no", ¿por qué?

- ☐ Quiero quedar embarazada  
☐ No tengo una pareja entonces no necesito un método anticonceptivo.  
☐ Mi pareja no está de acuerdo que use un método anticonceptivo.  
☐ Tengo miedo de los efectos secundarios  
☐ No quiero empezar un método anticonceptivo porque no voy a poder continuarlo por problemas de tiempo, costo, y transporte.  
☐ No sé  
☐ Otro  
((Marque todos los que apliquen))

Si escogió otro motivo por el cual no está usando un método de contracepción, explique el motivo

\_\_\_\_\_

Si escogió que tiene miedo de los efectos secundarios, ¿cuáles son esos efectos secundarios?

\_\_\_\_\_

Desde que dio a luz, ¿ha vuelto a quedar embarazada?

- ☐ Sí  
☐ No  
☐ No sé

---

¿Qué pasó con el embarazo?

- ☐ Aborto espontáneo  
☐ Terminación del embarazo  
☐ Actualmente, estoy embarazada
- 

ENFERMERA: SI LA PACIENTE ESTÁ ACTUALMETNE EMBARAZADA, DEBERÍA ADVERTIRLE QUE PARE SU MÉTODO ANTICONCEPTIVO SI LO SIGUE USANDO Y QUE SE INSCRIBA EN MADRES SANAS.

## Forma de Extracción de Implante

---

¿Por qué quieres eliminar(quitarte) tu implante?

- ☐ Quiero quedar embarazada
- ☐ No tengo una pareja entonces no necesito un método anticonceptivo.
- ☐ Mi pareja no está de acuerdo que use un método anticonceptivo.
- ☐ Tengo efectos secundarios
- ☐ No sé
- ☐ Otro

---

¿Cuáles son estos efectos secundarios?

---
